# Supplementary material
Source: PubMed Central journal article supplement (PMC6881184)
Supplement: EMS84351-supplement-SI_Tables_1_7.pdf [file EMS84351-supplement-SI_Tables_1_7.pdf]

**SI Table 1 | List of stable cell lines used**

| Cell Lines       |                |              |
|------------------|----------------|--------------|
| Descriptor       | Base cell line | resistance   |
| A549-ssGFP-KDEL  | A549           | puromycin    |
| A549-ATL1 KO     | A549           | puromycin    |
| A549-ATL2 KO     | A549           | blasticidin  |
| A549-ATL3 KO     | A549           | puromycin    |
| A549-HA-empty    | A549           | puromycin    |
| A549-HA-ATL2     | A549           | puromycin    |
| A549-HA-ATL3     | A549           | puromycin    |
| A549-HA-CANX     | A549           | puromycin    |
| A549-ATL3-ET-GFP | A549           | Blasticidine |
| A549-CD4-furin   | A549           | puromycin    |
| Huh7-Lunet/T7    | Huh7-Lunet-    | Zeocin       |

**SI Table 2 | qPCR and cloning primers**

| qPCR primers                              |                                                             |                                                              |
|-------------------------------------------|-------------------------------------------------------------|--------------------------------------------------------------|
| Name                                      | Forward primer                                              | Reverse primer                                               |
| Atlastin 1                                | 5'-ccctgtgcacttggccatat-3'                                  | 5'-ttgtacaaagcctggcccac-3'                                   |
| Atlastin 2                                | 5'-ttgccacatcctgttctaaa-3'                                  | 5'-gcagcaatggaaccagattt-3'                                   |
| Atlastin 3                                | 5'-acaagccctgactttgatgg-3'                                  | 5'-tgcagctgctaagttgttg-3'                                    |
| HPRT                                      | 5'-cctggcgtcgtgattatg-3'                                    | 5'-acacccttccaatcctcag-3'                                    |
| DENV                                      | 5'-gcccttctgtcacaccatt-3'                                   | 5'-ccacattggcgtaagact-3'                                     |
| ZIKV                                      | 5'-agatgaactgattggccggc-3'                                  | 5'-aggctctctgtggaata-3'                                      |
| WNV                                       | 5'-gggccttctgtcgtgtctg-3'                                   | 5'-ctggcatgctgatctggctg-3'                                   |
| ARF4                                      | 5'-cttctgcttgcacctac-3'                                     | 5'-aatgcgcatctgcttctg-3'                                     |
| ARF5                                      | 5'-gaactactaggcctcatct-3'                                   | 5'-gtcctctgcagcatcttct-3'                                    |
| Lunapark                                  | 5'-tggcatggcttgaaggaaga-3'                                  | 5'-ggaagtctggagcctgagg-3'                                    |
| RTN3                                      | 5'-tcctggctcttctctgtca-3'                                   | 5'-tgaatggatggccttctt-3'                                     |
| Expression constructs and cloning primers |                                                             |                                                              |
| Expression Plasmid                        | Forward primer                                              | Reverse primer                                               |
| pWPI-nHA-ATL2                             | 5'-ggggacaagttgtacaaaaagcaggcttagcgg agggggacgaggca-3'      | 5'-ggggaccactttgtacaagaaagctggtaattttctt ctgttattgttga-3'    |
| pWPI-nHA-ATL3                             | 5'-ggggacaagttgtacaaaaagcaggcttagaga gcagcaagcctggcc-3'     | 5'-ggggaccactttgtacaagaaagctgggtactattga gctttttatccat-3'    |
| pWPI-rosa26-ATL2                          | 5'-ggggacaagttgtacaaaaagcaggcttaattggcg gagggggacgaggca-3'  | 5'-ggggaccactttgtacaagaaagctggtaattttctt ctgttattgttga-3'    |
| pWPI-rosa26-ATL3                          | 5'-ggggacaagttgtacaaaaagcaggcttaattggag agcagcaagcctgggt-3' | 5'-ggggaccactttgtacaagaaagctgggtactattgagc tttttatccat-3'    |
| pWPI-rosa26-ATL2ΔN                        | 5'-ggggacaagttgtacaaaaagcaggcttagctcatg aagatgaccata-3'     | 5'-ggggaccactttgtacaagaaagctggtaattttctt ctgttattgttga-3'    |
| pWPI-rosa26-ATL2ΔC                        | 5'-ggggacaagttgtacaaaaagcaggcttaattggcg gagggggacgaggca-3'  | 5'-ggggaccactttgtacaagaaagctgggtattagaca tatcccaagtacaaa-3'  |
| pWPI-rosa26-cyATL2                        | 5'-ggggacaagttgtacaaaaagcaggcttaattggc ggagggggacgaggca-3'  | 5'-ggggaccactttgtacaagaaagctggtaaacgagc agcatagaagatatt-3'   |
| pWPI-rosa26-ATL2K107A                     | 5'-tccgtaaggGCGctccttactag-3'                               | 5'-ctagtaggaatgacGCCccttacgga-3'                             |
| pWPI-rosa26-ATL2/3N                       | 5'-ggggacaagttgtacaaaaagcaggcttaattgga gagcagcaagcctgt-3'   | 5'-ggggaccactttgtacaagaaagctggtaattttctt ctgttattgttga-3'    |
| pWPI-rosa26-ATL2/3C                       | 5'-ggggacaagttgtacaaaaagcaggcttaattggc ggagggggacgaggca-3'  | 5'-ggggaccactttgtacaagaaagctgggtactattga gctttttatccat-3'    |
| pWPI-rosa26-ATL3ΔN                        | 5'-ggggacaagttgtacaaaaagcaggcttaattgtt ggtcagaagatcaa-3'    | 5'-ggggaccactttgtacaagaaagctgggtactattga gctttttatccat-3'    |
| pWPI-rosa26-ATL3ΔC                        | 5'-ggggacaagttgtacaaaaagcaggcttaattg gagagcagcaagcctgt-3'   | 5'-ggggaccactttgtacaagaaagctgggtattagat gtagccccagtgaggag-3' |
| pWPI-rosa26-cyATL3                        | 5'-ggggacaagttgtacaaaaagcaggcttaattg agagcagcaagcctgt-3'    | 5'-ggggaccactttgtacaagaaagctgggtataca acctcaagacctatgaa-3'   |
| pWPI-rosa26-ATL3K55A                      | 5'-ccgaaagggGCGctccttactctg-3'                              | 5'-cagaatgaaggacGCCccttctcg-3'                               |

**SI Table 3 | shRNA constructs**

| GENE        | Product type     | Clone 1        | Clone 2        | Clone 3        |
|-------------|------------------|----------------|----------------|----------------|
| ATL1        | SHCLNG-NM_015915 | TRCN0000118754 |                |                |
| ATL2        | SHCLNG-NM_022374 | TRCN0000156356 | TRCN0000150557 |                |
| ATL3        | SHCLNG-NM_015459 | TRCN0000135012 | TRCN0000134347 |                |
| PDCD6       | SHCLNV-NM_013232 | TRCN0000303757 | TRCN0000303818 | TRCN0000310504 |
| PTGS2       | SHCLNV-NM_000963 | TRCN0000045533 | TRCN0000045537 | TRCN0000045534 |
| SLC25A10    | SHCLNV-NM_012140 | TRCN0000038584 | TRCN0000038588 | TRCN0000038585 |
| STAU1       | SHCLNV-NM_004602 | TRCN0000166217 | TRCN0000164920 | TRCN0000161773 |
| CHP1        | SHCLNV-NM_007236 | TRCN0000236441 | TRCN0000236437 | TRCN0000236440 |
| OXA1L       | SHCLNV-NM_005015 | TRCN0000298236 | TRCN0000293903 | TRCN0000286466 |
| SFXN1       | SHCLNV-NM_022754 | TRCN0000296550 | TRCN0000290347 | TRCN0000290346 |
| GPD2        | SHCLNV-NM_000408 | TRCN0000028595 | TRCN0000028650 | TRCN0000028579 |
| ALG2        | SHCLNV-NM_033087 | TRCN0000306888 | TRCN0000286733 | TRCN0000294130 |
| STAU2       | SHCLNV-NM_014393 | TRCN0000157149 | TRCN0000178809 | TRCN0000152870 |
| ATAT1       | SHCLNV-NM_024909 | TRCN0000282709 | TRCN0000263597 | TRCN0000263599 |
| FIP1L1      | SHCLNV-NM_030917 | TRCN0000074420 | TRCN0000074419 | TRCN0000074422 |
| GHSR        | SHCLNV-NM_004122 | TRCN0000368671 | TRCN0000368456 | TRCN0000357083 |
| MYH9        | SHCLNV-NM_002473 | TRCN0000285480 | TRCN0000276055 | TRCN0000276070 |
| TPM1        | SHCLNV-NM_000366 | TRCN0000062149 | TRCN0000062152 | TRCN0000062148 |
| DSTN        | SHCLNV-NM_006870 | TRCN0000116878 | TRCN0000116881 | TRCN0000116879 |
| GADD45GIP1  | SHCLNV-NM_052850 | TRCN0000241878 | TRCN0000241882 | TRCN0000241881 |
| HTATIP2     | SHCLNV-NM_006410 | TRCN0000280407 | TRCN0000280399 | TRCN0000280451 |
| SCD1        | SHCLNV-NM_005063 | TRCN0000327814 | TRCN0000312672 | TRCN0000327889 |
| OSTC        | SHCLNV-NM_021227 | TRCN0000134823 | TRCN0000133728 | TRCN0000134376 |
| APOBEC3C    | SHCLNV-NM_014508 | TRCN0000299560 | TRCN0000299626 | TRCN0000299627 |
| PSME2       | SHCLNV-NM_002818 | TRCN0000365036 | TRCN0000377438 | TRCN0000365083 |
| MRPL49      | SHCLNV-NM_004927 | TRCN0000276508 | TRCN0000276564 | TRCN0000276509 |
| PTGES       | SHCLNV-NM_004878 | TRCN0000290184 | TRCN0000290183 | TRCN0000290182 |
| OS9         | SHCLNV-NM_006812 | TRCN0000157242 | TRCN0000156713 | TRCN0000152720 |
| ARF4        | SHCLNV-NM_001660 | TRCN0000298174 | TRCN0000293758 | TRCN0000293699 |
| USMG5       | SHCLNV-NM_032747 | TRCN0000161079 | TRCN0000162046 | TRCN0000165243 |
| VKORC1      | SHCLNV-NM_206824 | TRCN0000300146 | TRCN0000300212 | TRCN0000300209 |
| UQCRH       | SHCLNV-NM_006004 | TRCN0000437224 | TRCN0000437184 | TRCN0000435536 |
| ATP5O       | SHCLNV-NM_001697 | TRCN0000300165 | TRCN0000300164 | TRCN0000310584 |
| TRC1.5 ctrl |                  | SHC016V        | SHC002V        |                |
| TRC2 Ctrl   |                  | SHC216V        | SHC202V        |                |
| ARF5        | SHCLNG-NM_001662 | TRCN0000381461 |                |                |
| RTN3        | SHCLNG-NM_006054 | TRCN0000203633 |                |                |
| Lunapark    | SHCLNG-NM_030650 | TRCN0000279672 |                |                |

**SI Table 4 | CRISPR/Cas9 Knock out guide sequences**

| GENE | Expression construct | Guide RNA                  |
|------|----------------------|----------------------------|
| ATL1 | pATL1KO-1            | 5'-GAGGAGCCAGTGAAAAAGGC-3' |
| ATL1 | pATL1KO-2            | 5'-GTTGAGATACATGTACAACC-3' |
| ATL2 | pATL2KO-1            | 5'-GCAACTTTAAGACCAGGATG-3' |
| ATL2 | pATL2KO-2            | 5'-TTCAATCTCCCATCAAAACT-3' |
| ATL3 | pATL3KO-1            | 5'-GTGGTCCTGCAAGAGGATGC-3' |
| ATL3 | pATL3KO-2            | 5'-ACTCCAGATTTGAATCCCAG-3' |

**SI Table 5 | List of primary antibodies used in this study**

| Primary antibodies |                            |                  |
|--------------------|----------------------------|------------------|
| Antibody target    | Company or reference       | Catalogue number |
| GFP                | Roche                      | 11814460001      |
| HA epitope         | Sigma Aldrich              | H3663            |
| HA epitope         | ThermoFisher               | PA1-985          |
| ARF4               | Proteintech                | 11673-1-AP       |
| GAPDH              | Santacruz                  | sc365062         |
| Alpha Tubulin      | Hözel                      | A01410           |
| Beta Actin         | Sigma Aldrich              | A5441            |
| TGN46              | Biorad                     | AHP500G          |
| furin              | ThermoFisher               | PA1-062          |
| RTN3               | Santacruz                  | sc374599         |
| Climp63            | Enyo                       | LX-804-604-C100  |
| FLAG epitope       | Sigma Aldrich              | F1804            |
| PDI                | ThermoFisher               | P7496            |
| ATL2               | Biomol                     | A303-332A-M      |
| ATL3               | Abcam                      | ab117819         |
| ATP5B              | Abcam                      | ab14730          |
| RAB5               | Cell Signalling Technology | 3547S            |
| RAB7               | Santa Cruz                 | sc-376362        |
| DENV NS3           | Genetex                    | GTX629477        |
| DENV Envelope      | Gentex                     | GTX127277        |
| DENV Capsid        | Gentex                     | GTX103343        |
| DENV NS4B          | Genetex                    | GTX133311        |
| DENV prM           | Abcam                      | AB41473-1        |
| dsRNA              | Scicons                    | 10010500         |
| DENV Capsid        | Gift from John Aaskov      | NA               |
| DENV Envelope      | (Miller et al., 2006)      | NA               |
| DENV prM           | (Welsch et al. 2009)       | NA               |
| DENV NS1           | (Welsch et al. 2009)       | NA               |
| DENV NS2B          | (Welsch et al. 2009)       | NA               |
| DENV NS3           | (Miller et al., 2006)      | NA               |
| DENV NS4B          | (Miller et al., 2006)      | NA               |
| DENV NS5           | (Miller et al., 2006)      | NA               |
| CD4-647            | Novus                      | NBP2-52706AF647  |

**SI Table 6 | List of secondary antibodies used in this study**

| Secondary Antibodies                    |                                       |                  |
|-----------------------------------------|---------------------------------------|------------------|
| Antibody target                         | Company                               | Catalogue number |
| Goat anti-rabbit IgG-HRP                | Sigma Aldrich                         | A6154            |
| Goat anti-mouse IgG-HRP                 | Sigma Aldrich                         | A4416            |
| Alexa Fluor 488 donkey anti-rabbit IgG  | Thermofisher                          | A-21206          |
| Alexa Fluor 488 donkey anti-mouse IgG   | Thermofisher                          | A-21202          |
| Alexa Fluor 488 donkey anti-mouse IgG2a | Thermofisher                          | A-21131          |
| Alexa Fluor 568 donkey anti-rabbit IgG  | Thermofisher                          | A-10042          |
| Alexa Fluor 568 donkey anti-mouse IgG   | Thermofisher                          | A-10037          |
| Alexa Fluor 568 donkey anti-mouse IgG1  | Thermofisher                          | A-21124          |
| Alexa Fluor 647 donkey anti-rabbit IgG  | Thermofisher                          | A -31573         |
| Alexa Fluor 647 donkey anti-mouse IgG   | Thermofisher                          | A-31571          |
| Alexa Fluor 647 donkey anti-mouse IgG2b | Thermofisher                          | A-21242          |
| STAR RED Goat anti-Rabbit IgG           | Sigma Aldrich                         | 41699            |
| Atto 594 Goat anti-mouse IgG            | Sigma Aldrich                         | 76085            |
| Protein A-Gold, 10 nm                   | Utrecht Cell Microscopy Core Facility | NA               |

**SI Table 7 | shRNA constructs**

| Accession      | Species                              | Atlastin |
|----------------|--------------------------------------|----------|
| XP_019849134.1 | <i>Amphimedon queenslandica</i>      | AtI      |
| XP_001635066.1 | <i>Nematostella vectensis</i>        | AtI      |
| NP_651274.1    | <i>Drosophila melanogaster</i>       | AtI      |
| XP_002127593.1 | <i>Ciona intestinalis</i>            | AtI      |
| XP_004997008.1 | <i>Salpingoeca rosetta</i>           | AtI      |
| XP_019627448.1 | <i>Branchiostoma belcheri</i>        | AtI      |
| CBY20949.1     | <i>Oikopleura dioica</i>             | AtI      |
| XP_002730796.1 | <i>Saccoglossus kowalevskii</i>      | AtI      |
| XP_001744281.1 | <i>Monosiga brevicollis</i>          | AtI      |
| XP_001663157.1 | <i>Aedes aegypti</i>                 | AtI      |
| NP_001023492.1 | <i>Caenorhabditis elegans</i>        | AtI-A    |
| XP_002115752.1 | <i>Trichoplax adhaerens</i>          | AtI-A    |
| XP_781017.3    | <i>Strongylocentrotus purpuratus</i> | AtI-A    |
| XP_002116209.1 | <i>Trichoplax adhaerens</i>          | AtI-B    |
| NP_502809.2    | <i>Caenorhabditis elegans</i>        | AtI-B    |
| XP_011666775.1 | <i>Strongylocentrotus purpuratus</i> | AtI-B    |
| NP_056999.2    | <i>Homo sapiens</i>                  | AtI1     |
| XP_015132233.1 | <i>Gallus gallus</i>                 | AtI1     |
| XP_016280549.1 | <i>Monodelphis domestica</i>         | AtI1     |
| NP_001139172.1 | <i>Danio rerio</i>                   | AtI1     |
| XP_007439467.1 | <i>Python bivittatus</i>             | AtI1     |
| NP_848743.1    | <i>Mus musculus</i>                  | AtI1     |
| XP_001515152.2 | <i>Ornithorhynchus anatinus</i>      | AtI1     |
| NP_001072222.1 | <i>Xenopus tropicalis</i>            | AtI1     |
| XP_020370135.1 | <i>Rhincodon typus</i>               | AtI1     |
| XP_007886393.1 | <i>Callorhynchus milii</i>           | AtI1     |
| NP_071769.2    | <i>Homo sapiens</i>                  | AtI2     |
| XP_007431746.1 | <i>Python bivittatus</i>             | AtI2     |
| XP_015139056.1 | <i>Gallus gallus</i>                 | AtI2     |
| XP_007477079.1 | <i>Monodelphis domestica</i>         | AtI2     |
| NP_001103492.1 | <i>Danio rerio</i>                   | AtI2     |
| NP_062691.3    | <i>Mus musculus</i>                  | AtI2     |
| XP_004914749.1 | <i>Xenopus tropicalis</i>            | AtI2     |
| XP_007659666.1 | <i>Ornithorhynchus anatinus</i>      | AtI2     |
| XP_007892554.1 | <i>Callorhynchus milii</i>           | AtI2     |
| XP_020365818.1 | <i>Rhincodon typus</i>               | AtI2     |
| NP_056274.3    | <i>Homo sapiens</i>                  | AtI3     |
| XP_007442555.1 | <i>Python bivittatus</i>             | AtI3     |
| NP_001006016.1 | <i>Danio rerio</i>                   | AtI3     |
| XP_007497801.1 | <i>Monodelphis domestica</i>         | AtI3     |
| NP_001016595.1 | <i>Xenopus tropicalis</i>            | AtI3     |
| NP_001156977.1 | <i>Mus musculus</i>                  | AtI3     |
| XP_007656076.1 | <i>Ornithorhynchus anatinus</i>      | AtI3     |
